# Supplementary material for: Feeding strategy as a key driver of the bioaccumulation of MeHg in megabenthos
Source: Copernicus journal article supplement (doi:10.5194/egusphere-2025-1494), 2025-04-24
Supplement: Supplementary file [file egusphere-2025-1494-AC2-supplement.pdf]

# 1 General answer

## Author Response

Thank you for your great comments. Before I go into the individual comments in detail, I want to acknowledge a limitation in the paper that you flagged in several of your comments. This is related to the evaluation of the model output and the problem that the combining of data from various locations brings. This was done because, although data on Hg bioaccumulation can be found more often, studies measuring both MeHg and Trophic Level are less common. That being said, two big studies came out in 2024 that after I did the original data analyzes and I can include these papers. Although 2 papers sounds small, they have a lot of samples and drastically improve the sample size. Especially the paper by McClelland et al. (2024) can really supplement the paper. They sampled 476 benthic animals from two locations in the Canadian Arctic. I would suggest that in addition to pooling all the data to see for general patterns, I use these data to verify if the feeding strategy also plays a significant role within the same dataset. I would add these additional analyses on several locations in the manuscript, so I will first describe my suggested addition here as I believe it is relevant for several suggestions you made.

## Suggested edit

### Evaluating the role of feeding strategy using a single large dataset

A third test of our hypothesis using field data from a single study to see if the same dynamics as occurred in our model are present in these observations. We used MeHg bioaccumulation and trophic level data from 476 individuals across 53 taxa of benthic invertebrates as published by McClelland et al. (2024). These data were selected as it is the largest study we could find with both trophic level and MeHg concentrations. When several animals of the same group were sampled, the dataset presents mean values per group per location, which we use as one datapoint in our analyses. Although feeding strategies in the dataset were broadly aligned with our classifications, we reassigned them to match the functional groups in our model. For example, shrimps were categorized as generalist feeders, which group is not present in McClelland et al. (2024), and isopods, which can be small benthic predators, were labeled as deposit feeders because their prey type is not represented in our model.

The data is sampled from two locations in the Canadian Arctic, Cape Bathurst (CB), which has a depth of 22 m and is located at 70°41'42.79" N, 128°50'21.34" W, and the eastern coast of Herschel Island in the Mackenzie Trough (MT), which has a depth of 116 m and is located at 69°36'44.96" N, 138°33'45.25" W. It must be noted this dataset is selected as it is extensive, but the region does have notable differences to the North Sea, where our model is run. It has extensive ice cover in winter, it is colder and is geographically distant from the model location. It does however, provide us with an opportunity to test if our model conclusions can be verified using field observations from a single study.

## Author Response

I will add this to the methods section at line 218

### Suggested edit

#### Evaluation of the model using a single dataset

To isolate the effect of the feeding strategy on MeHg bioaccumulation, we first transformed MeHg concentrations to their natural logarithm and fit a linear model with trophic level as predictor using the base R `lm()` function. The significance of the deviation from the predicted MeHg concentration at the trophic level was assessed using a one-sample  $t$  tests. To improve interpretability, we calculated the percentage differences using  $\text{Percentage difference} = 100 \times \left( \frac{\text{MeHg}_{\text{Gobs.}}}{\text{MeHg}_{\text{pred}}} - 1 \right)$  based on the residuals of the linear fit. This is visualized on a bar graph showing the percentage difference in MeHg concentration caused by the feeding strategy. The errors bars represent the 1 Standard Error (SE). The same analysis was then performed to estimate differences in MeHg bioaccumulation related to phylum.

As a final test, linear models were fitted on the natural logarithm of bioaccumulated MeHg concentrations using trophic level, phylum, and feeding strategy as predictor variables (using the `lm()` function in R). Estimated marginal means (EMM) for each feeding strategy were calculated with the `emmeans()` function of the `emmeans` package and compared against the overall mean to assess deviations. This analysis was also performed separately for the MT and CB locations to verify the consistency of the effects of the feeding strategy. The EMMs were transformed to a percentage difference with the earlier used equation and the estimated percentage difference due to feeding strategy and its significance is shown.

### Author Response

I will add this to the result and discussion about the literature study result section (3.1). At line 351.

### Suggested edit

The fit of the linear model against the natural logarithm of the bioaccumulated MeHg is shown in Fig. 1. The  $R^2$  is similar with 0.43 and 0.45 in the CB and MT respectively, while the bioaccumulation is a bit lower in the CB ( $\log(\text{MeHg}_{\text{BA}}) = 0.137 + 1.14 \cdot \text{TL}$ ) compared to that in the MT ( $\log(\text{MeHg}_{\text{BA}}) = 0.256 + 1.39 \cdot \text{TL}$ ), where  $\text{MeHg}_{\text{BA}}$  is the bioaccumulated MeHg in  $\text{ng Hg mg}^{-1} \text{ d.w.}$  and TL is the trophic level. The influence of the feeding strategy on MeHg bioaccumulation based on the results of McClelland et al. (2024) is shown in Table 1. While the only significant effect is deposit feeders in the MT having less MeHg than would be expected on their trophic positions, some other effects are consistent, albeit not significant in both locations. The strongest effect is that filter feeders have consistently higher MeHg (residuals are 0.7 in the CB and 0.8 in the MT), while deposit feeders have lower MeHg (residuals are -0.2 in the CB and -0.5 in the MT). The results of the same analyses for phyla are shown in Table 2. Here we see two consistent significant effects. Molluscs have elevated MeHg levels (residuals are 0.61 in the CB and 0.51 in the MT) while arthropods have reduced MeHg values (residuals are -0.35 in the CB and -0.30 in the MT). The percentage difference in MeHg bioaccumulation per feeding strategy is visualised in Fig. 2 and per phyla in Fig. 3. The average percentage difference between observed and the expectation based on trophic level is 102% and 128% in the CB and MT respectively for filter feeders while deposit feeders have 19 and 37% less MeHg than would be predicted based on trophic level alone in the CB and MT respectively. In the the analysis per phylum we see that molluscs have highly elevated MeHg levels with an increase of 66%

and 85% respectively in the CB and MT. The largest reduction in observed MeHg compared to the predicted values based on trophic level is in arthropods, here there is a decrease compared to the predicted values of 29% and 26% in the CB and MT respectively.

The results of the final analyses are shown in Table 3. Despite the lower sample size, which reduces statistical power, the results indicate that filter feeders consistently have higher MeHg levels than predicted based on their trophic position and phyla, while deposit feeders tend to have lower MeHg concentrations. These results are stronger in the MT with a change of 118% and -40% in filter and deposit feeders respectively than in the CB with a change of 7.2% and -14.8% in filter and deposit feeders respectively. It must be stated that this final analysis is included to address potential concern between the co-correlation of phyla and feeding strategy, but the problem of the reduced sample size has to be addressed. In the CB, where the increase in MeHg in filter feeders is rather low after correcting for both trophic level and feeding strategy, there are only three filter feeders, which are molluscs, and they make up 3/5 mollusc samples in this location, meaning that results should be seen with skepticism as filter feeders and molluscs have too much overlap. On the other hand, in the MT, there are five filter feeders from multiple phyla (Mollusca and Echinodermata) and the effect is considerably stronger with filter feeders having 118% more MeHg than would be expected based on their trophic level and phyla.

#### Author Response

I will add the following component to the discussion to evaluate the uncertainty of these results.

#### Suggested edit

Combining the results of the model and the literature studies is difficult due to the high uncertainty in most drivers, including the organic material content of dry weight and result should be viewed with skepticism. The data used in this study was prepared by McClelland et al. (2024) to mimic consumption by predators: for small arthropods, their skin was not removed, but for gastropods and bivalves, the shell was not taken into account for the weight as predators would typically not eat this. The concentration of MeHg per unit energy is arguably the key measure in bioaccumulation. Predators need to ingest a specific energy amount, so if a prey is composed of half organic material and half non-organic components, such as shell, its MeHg content per dry weight is halved. However, predators would consume double the dry weight to obtain the energy, and thus the same MeHg. In general, the energy appears to be consistent with Ash Free Dry Weight (AFDW), as such ideally we would normalize all measurement of MeHg bioaccumulation per AFDW (Weil et al., 2019).

Unfortunately, doing this conversion reliably on published data is not possible as AFDW varies with the age and body size of animals, which information is not generally available (Eklöf et al., 2017). That being said, we find it convincing that both our model results, the literature study in which we aggregate all measurements, and the literature study where we take samples from a single study all suggest that filter feeders have elevated MeHg.

The difference in the uptake of MeHg and organic carbon is also the main driver in our model of the difference caused between the bioaccumulation in filter and deposit feeders. In the model this is mostly driven by the lower feeding efficiency of MeHg presented by (Dutton & Fisher, 2012). While the lower assimilation efficiency of MeHg from sediment is

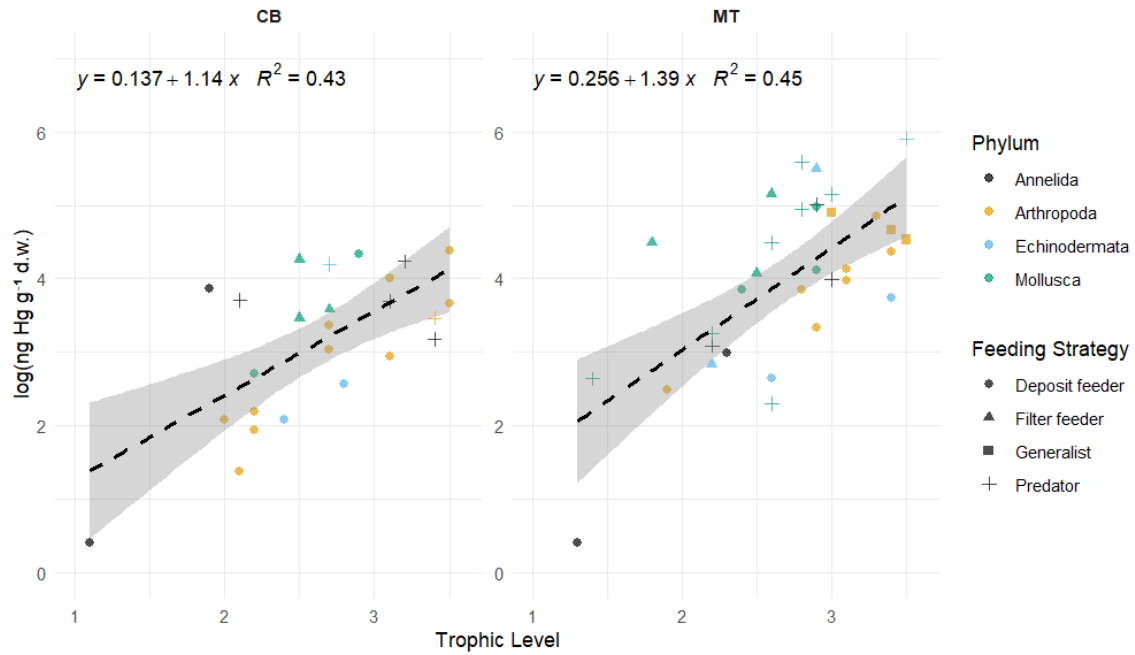

Figure 1: The linear fitted model between the natural logarithm of the bioaccumulated MeHg in  $\text{ng Hg mg}^{-1} \text{ d.w.}$  and the Trophic Level in the data presented by McClelland et al. (2024). For extra clarity the different Phyla shown with different colors while the different feeding strategies are marked with different symbols. In both the CB and MT setups there positive relationship between trophic level and the bioaccumulation of MeHg, but  $R^2$  is only 0.43 and 0.45 in the CB and MT respectively, so it does not explain the full variation in bioaccumulation.

understudied, it is supported by the limited available literature. In addition to the direct work by Dutton and Fisher (2012) analysing transfer efficiency of MeHg in the sediment to biota, it is also demonstrated that the concentration of MeHg in the sediment correlates poorly with the MeHg concentration in all biota, except infauna (Buckman et al., 2019; Chen et al., 2009). If MeHg would easily be transferred from the sediment to deposit feeders, there would be a much stronger correlation between sediment and deposit feeder MeHg concentrations.

More work is needed to analyse if molluscs also have elevated MeHg levels, especially when normalised to AFDW. While molluscs do appear to have more MeHg in our analyses, it is possible that the increase in MeHg in molluscs compared to other animals of the same trophic level is caused by a combination of co-correlation with the filter feeding strategy and an increase in AFDW percentage of dry weight in the mollusc samples as the weight of the shell was not taken into account. Focusing Hg monitoring on using a holistic approach in which ideally tHg, MeHg, trophic level and AFDW are sampled in fully identified species would help clarify whether bioaccumulation patterns associated with feeding strategy and phylum are robust and relevant for Hg risk management.

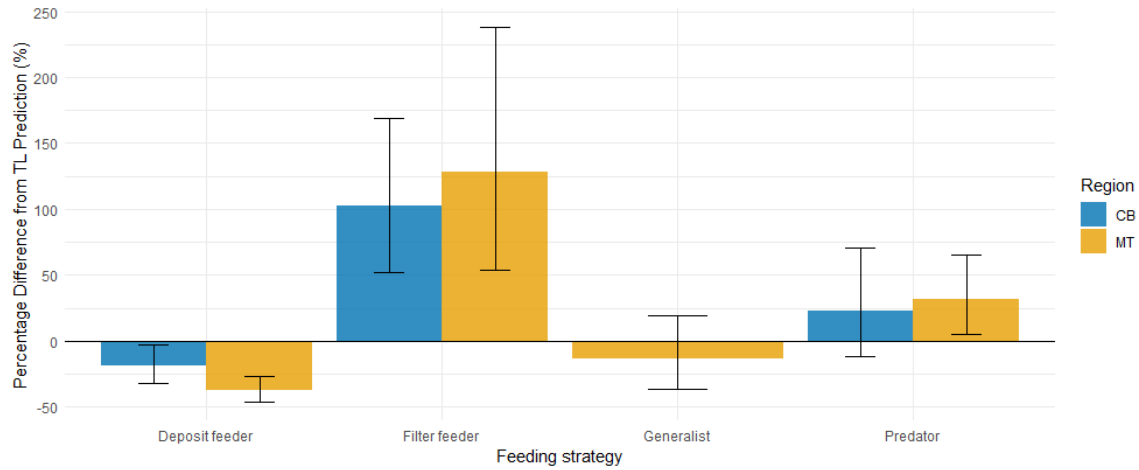

Figure 2: Percentage difference from trophic level predicted MeHg concentrations by feeding strategy, with error bars showing  $\pm 1$  SE. In both CB and MT regions, filter feeders have elevated MeHg levels relative to trophic level based expectations, while deposit feeders are reduced. Predators display higher MeHg than predicted, though the effect is smaller than in filter feeders; in CB, this increase does not exceed one SE. Generalist feeders have a slight reduction compared to expectations, but this is well within one SE, and were not present in CB for cross-region comparison.

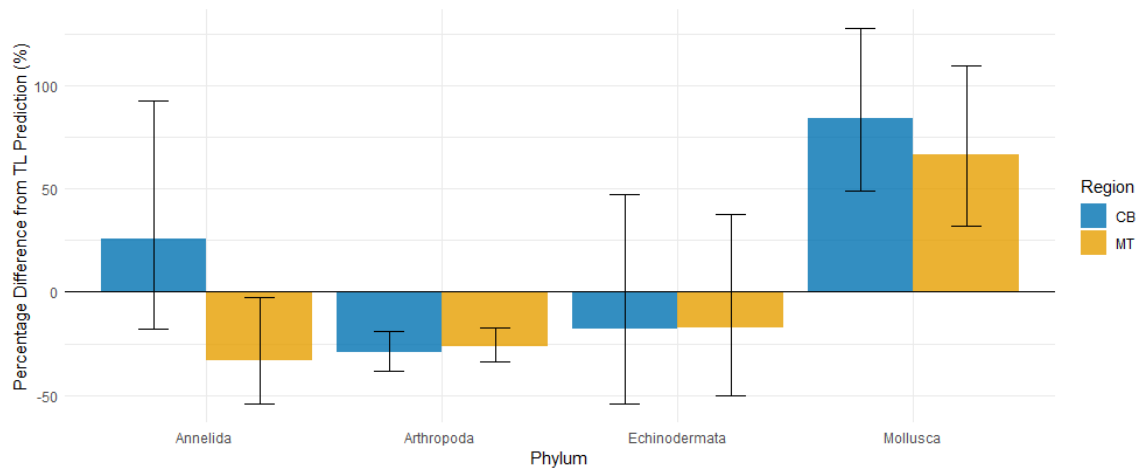

Figure 3: Percentage difference from the predicted MeHg bioaccumulated based on trophic level per phyla, the error bars represent  $\pm 1$  SE. The notable phyla are Mollusca and Arthropoda, while Mollusca have a notable increase in MeHg bioaccumulation compared to the prediction of 85% and 66% respectively in the CB and MT, there is a reduction of 26% and 29% in Arthropoda in the CB and MT respectively. Annelida are inconsistent with an increase in the CB and decrease in the MT compared to the predictions. Echinodermata have a mean reduction compared to the prediction in both the CB and the MT, but the SE is much larger than the mean effect.

Table 1: Mean residuals ( $\pm$ SE) of log(MeHg) by feeding strategy and region, after trophic level correction. Significant deviations ( $p < 0.05$ ) are marked with \*.

| Region | Feeding Strategy | $n$ | Mean Residual $\pm$ SE | p-value |
|--------|------------------|-----|------------------------|---------|
| CB     | Deposit feeder   | 16  | $-0.208 \pm 0.181$     | 0.268   |
| CB     | Filter feeder    | 3   | $0.704 \pm 0.286$      | 0.133   |
| CB     | Predator         | 6   | $0.203 \pm 0.331$      | 0.568   |
| MT     | Deposit feeder   | 15  | $-0.467 \pm 0.159$     | 0.011*  |
| MT     | Filter feeder    | 5   | $0.824 \pm 0.395$      | 0.105   |
| MT     | Generalist       | 3   | $-0.143 \pm 0.319$     | 0.698   |
| MT     | Predator         | 12  | $0.277 \pm 0.226$      | 0.247   |

Table 2: Mean residuals ( $\pm$ SE) of log(MeHg) by phylum and region, after trophic level correction. Significant deviations ( $p < 0.05$ ) are marked with \*.

| Region | Phylum        | $n$ | Mean Residual $\pm$ SE | p-value |
|--------|---------------|-----|------------------------|---------|
| CB     | Annelida      | 6   | $0.229 \pm 0.424$      | 0.612   |
| CB     | Arthropoda    | 11  | $-0.349 \pm 0.137$     | 0.0294* |
| CB     | Echinodermata | 3   | $-0.198 \pm 0.584$     | 0.767   |
| CB     | Mollusca      | 5   | $0.611 \pm 0.211$      | 0.0446* |
| MT     | Annelida      | 5   | $-0.405 \pm 0.377$     | 0.343   |
| MT     | Arthropoda    | 12  | $-0.304 \pm 0.111$     | 0.0196* |
| MT     | Echinodermata | 5   | $-0.188 \pm 0.509$     | 0.730   |
| MT     | Mollusca      | 13  | $0.509 \pm 0.231$      | 0.0482* |

Table 3: The effect of feeding strategy on MeHg bioaccumulation per Region compared to the prediction accounting for both trophic level and feeding strategy. Significant ( $p < 0.05$ ) is marked with \*. There is still a consistent increase in filter feeders and a consistent decrease in deposit feeders. This is effect is larger in the MT with a relative percentage increase of 118% in filter feeders and a decrease of 40% in deposit feeders.

| Feeding Strategy | % Diff (MT) | p-value (MT) | % Diff (CB) | p-value (CB) |
|------------------|-------------|--------------|-------------|--------------|
| Deposit feeder   | -40.0       | 0.034*       | -14.8       | 0.888        |
| Filter feeder    | 118.0       | 0.034*       | 7.2         | 0.888        |
| Generalist       | -25.9       | 0.563        | —           | —            |
| Predator         | 3.0         | 0.895        | 9.4         | 0.888        |

## Author Response

### Updated statistics due to extra data in the analyses

In addition to the extra papers added, a final small change was made: the assimilation efficiency of the deposit feeder was set to 0.12, as this is more in line with the literature presented by Dutton and Fisher (2012). To clarify, this and the addition of two more papers, of course, change the statistics and also highlight your concern about different base levels of Hg. The new statistical analyses are presented in Table 4. Because the new data has a higher baseline of MeHg, it indeed changes (in this case reduces) the agreement between the model and the observations in absolute terms. It does, however, not mean that the correlation between feeding strategies and elevated MeHg levels is different, as this remains consistent. To increase transparency of model fit, I will both show the  $R^2$  based on the Pearson correlation coefficient and the Residual-Based  $R^2$ .

### Suggested edit

Finally, the goodness of fit of the model is shown both based on the Pearson correlation coefficient and based on the residuals. It is important to note the difference between the  $R^2$  based on the Pearson correlation coefficient ( $R^2_{\text{Pearson}}$ ) and the Residual-Based  $R^2$  ( $R^2_{\text{Residual}}$ ). They are defined as  $R^2_{\text{Pearson}} = (\text{corr}(y_{\text{mod}}, y_{\text{obs}}))^2$  and the  $R^2_{\text{Residual}} = 1 - \frac{\sum (y_{\text{obs}} - y_{\text{mod}})^2}{\sum (y_{\text{obs}} - \bar{y}_{\text{obs}})^2}$ , where  $y_{\text{obs}}$  are the mean observed values and  $y_{\text{mod}}$  are the mean modeled value per feeding strategy. The  $R^2_{\text{Pearson}}$  describes how well a linear relationship between our model and the data holds, thus, if this is high, the models explain the observed differences between feeding strategies well, but it is not effected by the absolute concentrations. This means that the  $R^2_{\text{Pearson}}$  evaluates if our model accurately represents differences between feeding strategies, but it is not affected by a bias in the data due to mismatch between the baseline of MeHg bioaccumulation. The  $R^2_{\text{Residual}}$  measures how well the modeled values match the observations, including absolute values, which is both affected by the ability of the model to predict the effect of feeding strategy on bioaccumulation, and by overall concentrations of iHg and MeHg in biota. Both  $R^2_{\text{Pearson}}$  and  $R^2_{\text{Residual}}$  give a value below 1. Closer to 1 means a better fit while below 0 means that the the model does not outperform estimating the data based on the mean.

### Suggested edit

The  $R^2_{\text{Pearson}}$  is high ( $>0.86$ ) for MeHg in all setups and exceeds 0.99 in the AS model, indicating that the model captures the relative differences between feeding strategies well. For iHg, performance is lower, particularly in the Northern North Sea ( $R^2_{\text{Pearson}} = 0.24$ ). The ability to reproduce absolute bioaccumulation is more limited. Only the AS model in the Southern North Sea shows good agreement ( $R^2_{\text{Residual}} = 0.96$ ), while all other setups yield  $R^2_{\text{Residual}} < 0$ , suggesting that using the mean of the observations would outperform the model.

This can be explained, as baseline MeHg levels vary between sampling regions. Notably, the AS model in the Southern North Sea performs well both in reproducing overall MeHg levels and in explaining variability across feeding strategies. Even when excluding predators and top predators,  $R^2_{\text{Pearson}}$  remains high (0.80), suggesting that feeding strategy effects are captured across trophic levels and are not just driven by high MeHg levels in predatorial feeding strategies. In contrast, the Northern North Sea has a high  $R^2_{\text{Pearson}}$  ( $=0.94$ ) but low  $R^2_{\text{Residual}}$  ( $<0$ ) so it captures the effect of feeding strategies while not being able to resplicate absolute MeHg concentrations.

Table 4: Statistical analysis of model performance for iHg and MeHg levels by feeding strategy for Southern North Sea (SNS) and Northern North Sea (NNS).

|                                              | SNS     |       |         |       | NNS     |       |         |        |
|----------------------------------------------|---------|-------|---------|-------|---------|-------|---------|--------|
|                                              | iHg     |       | MeHg    |       | iHg     |       | MeHg    |        |
|                                              | N. Bias | BF10  | N. Bias | BF10  | N. Bias | BF10  | N. Bias | BF10   |
| <b>Suspension</b>                            | 0.18    | 0.11  | 0.85    | 0.011 | -0.18   | 0.11  | 0.17    | 0.0072 |
| <b>Filter</b>                                | 1.48    | 0.47  | -0.33   | 0.046 | 1.45    | 0.069 | -0.71   | 0.054  |
| <b>Deposit</b>                               | 1.01    | 0.078 | -0.44   | 0.046 | 0.34    | 0.034 | -0.77   | 0.052  |
| <b>Generalist</b>                            | 1.31    | 0.18  | -0.39   | 0.047 | 1.23    | 0.14  | -0.75   | 0.055  |
| <b>Predator</b>                              | 0.41    | 0.081 | -0.42   | 0.10  | 0.07    | 0.079 | -0.71   | 0.074  |
| <b>Top predator</b>                          | -0.22   | 0.089 | -0.80   | 0.51  | -0.46   | 0.10  | -0.93   | 0.59   |
| <b>Predator (AS)</b>                         | 0.41    | 0.081 | -0.31   | 0.093 | 0.07    | 0.079 | -0.75   | 0.11   |
| <b>Top predator (AS)</b>                     | -0.22   | 0.089 | -0.12   | 0.35  | -0.46   | 0.10  | -0.67   | 0.45   |
| <b>Overall Model Performance</b>             |         |       |         |       |         |       |         |        |
| <b>RMSE</b>                                  | 40      |       | 132     |       | 40      |       | 147     |        |
| <b>NRMSE</b>                                 | 0.36    |       | 0.35    |       | 0.35    |       | 0.39    |        |
| <b>R<sup>2</sup><sub>Pearson</sub></b>       | 0.61    |       | 0.86    |       | 0.24    |       | 0.94    |        |
| <b>R<sup>2</sup><sub>Residual</sub></b>      | <0      |       | <0      |       | <0      |       | <0      |        |
| <b>RMSE (AS)</b>                             | 40      |       | 22.8    |       | 27      |       | 108     |        |
| <b>NRMSE (AS)</b>                            | 0.36    |       | 0.061   |       | 0.26    |       | 0.29    |        |
| <b>R<sup>2</sup><sub>Pearson</sub> (AS)</b>  | 0.61    |       | >0.99   |       | 0.24    |       | >0.99   |        |
| <b>R<sup>2</sup><sub>Residual</sub> (AS)</b> | <0      |       | 0.96    |       | <0      |       | <0      |        |



## 2 Specific Comments

### Reviewer Comment

Data on mercury concentrations in marine megabenthos were compiled and examined for differences in bioaccumulation by feeding strategy. It appears a relatively small number of studies were used ( $n = 12$ , Table 5) compared to available published data on mercury in marine megabenthos. What criteria were used for the literature review and selection of papers?

### Author Response

The papers were selected with a focus on having both trophic level and MeHg concentrations estimated in marine megabenthos. These studies are indeed less common than studies sampling only metal concentration, including total Hg. While verifying new literature, I did find two new papers that were published last year that I would now include in the analyses. One of these papers has a very substantial dataset that allows us to verify our hypothesis purely based on this data at the beginning of this answer.

### Reviewer Comment

More information on the measurement of mercury burdens in the megabenthos studies seems important to include for interpretation and standardization. Sometimes megabenthos tissues cannot be sampled consistently due to differences in exoskeleton and body form. What tissue types were measured for mercury? (e.g., whole body [including exoskeleton], internal viscera, muscle). How was inorganic mercury concentration determined? (i.e., the studies in Table 5 do not include inorganic mercury). Are the modelled concentrations for whole body of megabenthos (e.g., Figure 6)?

### Author Response

The bioaccumulation in the model and the output in Fig. 6 is shown to be in ng Hg per mg carbon. In the model we tried to isolate the effect of the feeding strategy on bioaccumulation, so the conversion to dry weight assumes a 1:2 ratio. Most measurements indeed express bioaccumulation in dry weight and the carbon content of biota is seldom measured alongside Hg. The conversion from carbon to dry weight does indeed introduce uncertainty, but it is within reasonable levels. For example, the soft part of molluscs are for example found to have between 36% and 48% carbon per dry weight while the carbon content of arthropods (mysis mixta) was found to be 51.4% (Gorokhova & Hansson, 2000; Jurkiewicz-Karnkowska, 2005). The complications is that the study aims to look at the feeding strategy, which does vary between phyla. Filter feeders can, for example, be either arthropods in the form of barnacles, molluscs in the form of bivalves, annelids in the form of fan worms, or echinoderms in the form of brittle stars, because of this a standard 1:2 conversion ratio between carbon and dry weight was kept consistent over all feeding strategies. I will add these citations to the manuscript at the end of the model development section (line 152)

### Suggested edit

Our model is resolved in carbon content, while measurements are often in dry weight. The carbon fraction of dry weight generally ranges from 0.4 to 0.6, but can vary between different taxa (Gorokhova & Hansson, 2000; Jurkiewicz-Karnkowska, 2005). To ensure

consistency across different functional groups with diverse feeding strategies, we maintain a 1:2 conversion ratio for carbon to dry weight for all megabenthos functional groups.

#### Reviewer Comment

The empirical mercury data for megabenthos were pooled across geographic locations where environmental mercury exposure may have differed. How were potential confounding effects of geographic variation and feeding strategy resolved? Were the findings of feeding strategy influence on mercury burdens consistent with individual studies from specific geographic areas?

#### Author Response

I agree that this is an issue. We tried to validate our model findings using data, but data is not sufficiently available for all geographic locations to robust individual analyses. In order to address your concerns, we added the analyses solely based on the data presented (McClelland et al., 2024). Based on this, we can see that the results of our studies are consistent between the model, by pooling all geographical locations and by analysing two individual locations.

#### Reviewer Comment

Organism bioaccumulation is described as involving two key processes: bioconcentration and biomagnification (lines 26-34). A more nuanced discussion is suggested here on exposure pathways and also clarification on the mechanistic processes that were modelled. Uptake of aqueous inorganic mercury and methylmercury into the food web occurs via bioconcentration in primary producers. However, consumers are typically exposed to mercury primarily through their diet and not via bioconcentration from water.

#### Author Response

I will add the following expansion to section 2.5 on line 121. I would replace the part where I discuss the evaluation of the previous version of the model. The changes in megabenthos can have a feedback on Hg cycling so I added a new paragraph on the evaluation of pelagic Hg cycling and bioaccumulation later in the review. But then I can discuss the implementation of bioaccumulation in more detail here.

#### Suggested edit

Bioaccumulation is implemented to account for bioconcentration in all trophic levels and biomagnification in all consumers. Phytoplankton have a size-dependent uptake and release rate for the uptake and release of iHg. Based on observations by Pickhardt et al. (2006) which found higher MeHg in smaller phytoplankton but consistent iHg levels, phytoplankton have a size-dependent uptake rate and constant release rates. This means that diatoms and flagellates bioaccumulate similar amounts of iHg, while the smaller flagellates accumulate more MeHg. The uptake and release rates of iHg and MeHg in zooplankton are based on Tsui and Wang (2004) and on W. Wang and Wong (2003) for fish. An essential component of the ecosystem that interacts with bioaccumulation in megabenthos that was not overhauled for this study are the interactions between detritus and DOM and iHg and MeHg. The only  $\text{Hg}^{2+}$  and  $\text{MMHg}^+$  are assumed to partition to detritus and DOM, and this partitioning is assumed to be an equilibrium that is instantaneous and is reestimated on every time step. The equilibrium is based on the  $K_{ow}$  values which are

based on Allison et al. (2005) and Tesán Onrubia et al. (2020). This value is  $\log_{10}(6.4)$  and  $\log_{10}(6.6)$  for the partitioning of  $\text{Hg}^{2+}$  and  $\log_{10}(5.9)$  and  $\log_{10}(6.0)$  for the binding of  $\text{MMHg}^+$  to detritus and DOM respectively. This is the same approach that is used and evaluated in Bieser et al. (2023) and Amptmeijer et al. (2025).

#### Reviewer Comment

Figure 6 shows modelled concentrations in biota, where bioconcentrated and biomagnified mercury are differentiated. These model results are not consistent with known trophic transfer processes of mercury. In higher trophic level biota, very little of the total mercury burden is inorganic mercury (e.g., in contrast with modelled result for a top predator) and most mercury is obtained from diet rather than water (bioconcentration). In Figure 6, much of the bioaccumulated mercury is attributed to bioconcentration. E.g., see Wang and Wang, Environmental Pollution 2019, Volume 252, Part B, September 2019, Pages 1561-1573, and other studies cited therein.

#### Author Response

This image stems from an admittedly awkward design choice in the paper. As stated in the paper, we aimed to enhance the model's performance over its previous version by modifying how iHg and MeHg are released during respiration. While some species have relatively high iHg concentrations, it is typically much higher and is better depicted in the Allometric Scaling (AS) model. The image presented is of the base model, which shows MeHg levels that, while in the observed range, are below average observations. Additionally, while some experimental studies such as presented by W. Wang and Wong (2003) find that bioconcentration can be a major exposure route in fish, I agree that it is typically expected to be smaller, as is the case in the AS model.

To improve this in the manuscript we will display the bioaccumulation per group per source for the AS model, as depicted in Fig. 4. This is the better performing model and focusing the visualization on the base model creates unnecessary ambiguity. In the AS model, top predators have 80-90% of tHg from MeHg from biomagnification, which is more in line with the observations by W. X. Wang and Tan (2019). Bioconcentration remains a significant route in the model, but based on W. Wang and Wong (2003) this is in line with observations. I will move the image to the end of section 3.3 (line 301). So it can be discussed after the evaluation of the base setup and AS model is presented.

#### Reviewer Comment

The focus of this study is on megabenthos, i.e. consumer organisms. However, a key process that warrants more modelling attention is the process of methylmercury entry in the food web via primary producers. Figure 6 shows modelling results for diatoms and dinoflagellates. How do those mercury concentrations compare with empirical data for phytoplankton? How can the inorganic mercury and methylmercury in primary producers be a result of biomagnification, as indicated in the figure?

#### Author Response

About the labeling in Fig. 6, my apology that is indeed mislabeled. I will correct this as shown in Fig. 4. I think the question surrounding the comparison with phytoplankton aligns with your question about the model validation in the technical comments section "Line 195. Provide more detail on how the model performance was evaluated.". Since

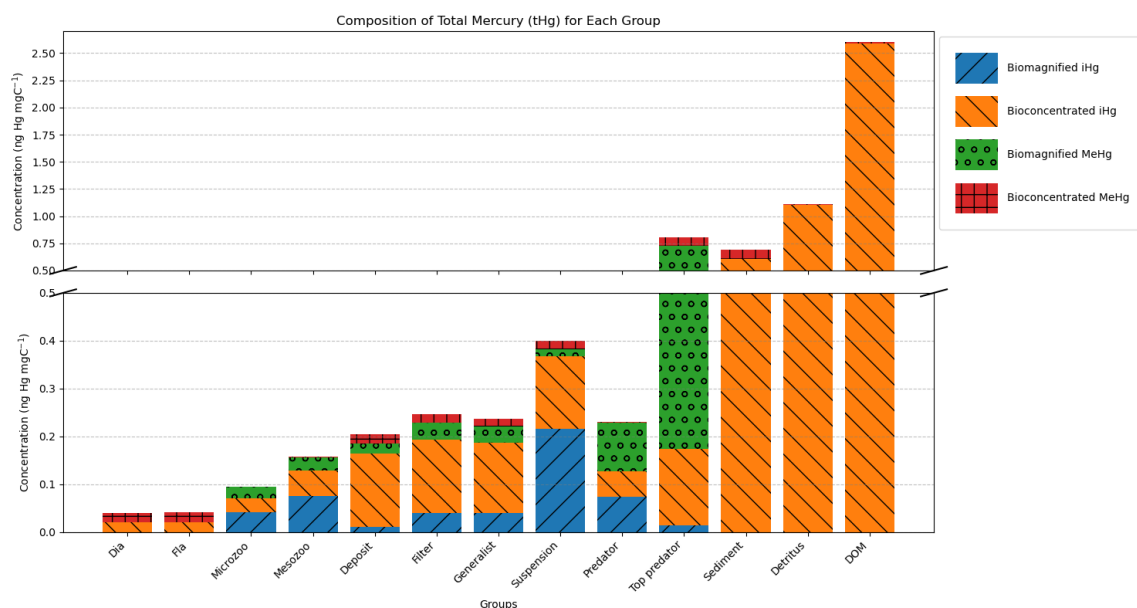

Figure 4: Modeled bioconcentration and biomagnification of iHg and MeHg. Partitioning to detritus and DOM is colored as bioconcentration. The y-axis is cut to show the high and low values. Notably is the high iHg to mgC ratio of detritus and DOM, leading to elevated iHg in suspension feeders. Additionally, higher trophic level animals have higher biomagnified MeHg.

the model is quite extensively evaluated for the bioaccumulation in megabenthos, I will add the following paragraph about the evaluation of the model performance in the pelagic before the evaluation of the bioaccumulation in benthos. So this would be section 2.1.1 on line 193, and the current section about the evaluation of megabenthos would be on line 2.1.2.

## Suggested edit

### 2.1 Evaluation of the Hg cycling and pelagic bioaccumulation

The marine cycling and speciation of Hg, in addition to the bioaccumulation in phytoplankton and zooplankton, is an essential driver of the bioaccumulation of iHg and MeHg in the benthic food web. Observed and modelled dissolved tHg concentration, the percentage of tHg that is MeHg, and the Hg content of phytoplankton and zooplankton is shown in Table 5. The concentration of dissolved tHg and the percentage of MeHg of dissolved tHg are compared to observations by Coquery and Cossa (1995), while the bioaccumulation of tHg in phytoplankton and zooplankton is compared to observations by Nfon et al. (2009). It must be noted that the observations by Nfon et al. (2009) are not from the North Sea itself, but from the better-studied nearby Baltic Sea. The average dissolved tHg concentration is 1.7 and 2.1 pM in the Northern and Southern North Sea, respectively. This is well within 1 standard deviation of the  $1.7 \pm 0.7$  pM observed by Coquery and Cossa (1995). The MeHg concentration was observed to be between 0.5 and 4.3% of tHg, with an average of 3% in the North Sea. The percentage MeHg in our model is 2.3% and 2.0% on average, which falls well within that range.

For bioaccumulation, we could not find separate reliable measurements of MeHg and iHg in phytoplankton and zooplankton in the North Sea, and we therefore evaluated the tHg content. This was measured in diatoms to be  $10 \pm 5$  ng Hg mg<sup>-1</sup>. This means that the mean bioaccumulation in our model in diatoms is lower, with 5.8 ng Hg mg<sup>-1</sup> and 9.0

ng Hg mg<sup>-1</sup> in the Northern and Southern North Sea, respectively, but still within 1 standard deviation of the measurements. Observations labeled as zooplankton and mysis were compared to our modeled microzooplankton and mesozooplankton, respectively. All modeled values fall within 1 standard deviation of the observed tHg concentration, with one exception: mesozooplankton in the Northern North Sea, which is 13.5% more than 1 standard deviation above the observations. This is mostly driven by a high iHg content, as the MeHg content is similar in microzooplankton and mesozooplankton.

This similarity in MeHg is caused because, even though mesozooplankton have a higher trophic level, they prefer to feed on larger diatoms which have less MeHg than smaller flagellates, which are preferred by microzooplankton. The high iHg content, especially in the Northern North Sea, is caused by the consumption of detritus by zooplankton in the model. While there is a shortage of data on bioaccumulation at the base of the food web, especially in the North Sea, which complicates model evaluation, the dissolved tHg concentration, the percentage of MeHg, and the tHg content of phytoplankton and zooplankton agree well with observations. With the exception of the 13.5% elevated tHg content in Northern North Sea mesozooplankton, all modeled values fall within 1 standard deviation of the observations. Because of this, we conclude that the model replicates marine Hg cycling and bioaccumulation at the base of the food web in line with observations, with the caveat that we do not have measurements of zooplankton in the Northern North Sea to verify or reject the elevated levels in that setup.

Table 5: Dissolved total Hg (pM), MeHg (% of tHg), and Hg concentrations in biota (ng Hg mg<sup>-1</sup> d.w.) across North Sea regions.

|                                                 | Observed    | NNS         | SNS         |
|-------------------------------------------------|-------------|-------------|-------------|
| tHg <sub>dissolved</sub> (pM)                   | 1.7 ± 0.7   | 1.7 ± 0.26  | 2.0 ± 0.28  |
| MeHg (% of tHg)                                 | 3 (0.5–4.3) | 2.3 ± 0.23  | 2.0 ± 0.31  |
| Diatoms (ng Hg mg <sup>-1</sup> )               | 10 ± 5      | 7.0 ± 1.1   | 8.3 ± 1.6   |
| Flagellates (ng Hg mg <sup>-1</sup> )           |             | 13.9 ± 3.0  | 14.3 ± 3.0  |
| Microzooplankton tHg (ng Hg mg <sup>-1</sup> )  | 37.5 ± 31.3 | 67.4 ± 29.3 | 40.3 ± 11.4 |
| Microzooplankton MeHg (ng Hg mg <sup>-1</sup> ) |             | 7.1 ± 2.1   | 10.5 ± 2.7  |
| Mesozooplankton tHg (ng Hg mg <sup>-1</sup> )   | 62.5 ± 12.5 | 86.7 ± 15.1 | 72.3 ± 19.6 |
| Mesozooplankton MeHg (ng Hg mg <sup>-1</sup> )  |             | 6.9 ± 2.6   | 10.5 ± 1.7  |

### 3 Technical Corrections

#### Reviewer Comment

Line 8. Is the inorganic mercury in filter feeders elevated, or more specifically, is it found as a higher proportion of total mercury compared to other megabenthos?

#### Author Response

No, filter feeders do not have elevated iHg levels. The iHg levels in filter feeders are large part of tHg, but filter feeders have similar iHg as most other macrobenthos but elevated MeHg levels, thus a reduced proportion of iHg of tHg. The main megabenthos group that has notably increase in iHg are the suspension feeders. They are defined by their ability to eat DOM (resembling sponges), where filter feeders cannot filter out dissolved particles. Suspension feeders on the other hand, have both elevated iHg levels and an elevated iHg to tHg ratio. This is true both in the model and in the observation in Mediterranean Sea sponges by Orani et al. (2020).

#### Reviewer Comment

Line 18. Cite a reference for this statement.

#### Author Response

I will expand on this sentence and add the reference as below:

#### Suggested edit

Anthropogenic emissions have significantly raised environmental Hg levels, with 78%, 85%, and 50% of atmospheric, upper ocean, and deep ocean Hg, respectively, originating from anthropogenic emissions (Geyman et al., 2025).

#### Reviewer Comment

Line 26-27. Does bioconcentration only occur in a polluted environment? Is the model then only relevant for polluted environments?

#### Author Response

I will update that as below.

#### Suggested edit

There are two key processes involved in bioaccumulation: bioconcentration and biomagnification. When animals absorb Hg directly from their environment; this is called bioconcentration.

#### Reviewer Comment

Line 45. The first effectiveness evaluation of the Minamata Convention has not been completed. Rephrase this text.

#### Suggested edit

Mercury concentrations tend to be lower in organisms at the base of the aquatic food web, resulting in reduced risk to humans. As such, these organisms are not prioritized in the current monitoring strategies under the ongoing effectiveness evaluation of the Minamata Convention, which focuses primarily on fish, humans, and predatory wildlife (Evers et al., 2016). Additionally, the evaluation to date has shown that Hg and MeHg concentrations in water and sediment do not correlate well with levels in biota, leading to greater emphasis on biological monitoring over abiotic compartments.

#### Reviewer Comment

Line 51-52. Some megabenthos are not lower trophic level biota (e.g., are secondary consumers) and thus are not necessarily representative of processes at the base of the food web.

#### Author Response

That is true and the paper does also look at higher trophic level benthos. I will rephrase this as follows:

#### Suggested edit

The benthic food web is highly complex, making it challenging to improve our understanding of bioaccumulation within it (Silberberger et al., 2018).

#### Reviewer Comment

Line 74. Perhaps change “in silico” to “a modelling experiment”

#### Suggested edit

Afterward, we conducted a modeling experiment in which megabenthos with various feeding strategies compete under physical drivers in idealized scenarios that are typical of megabenthos-rich coastal oceans.

#### Reviewer Comment

Line 86-89 and elsewhere. Use past tense to describe work that was completed.

#### Author Response

I will change that anywhere in the manuscript. I will update the paragraph with line 86-89 as below to correct this writing style:

#### Suggested edit

To compare the findings with the literature, we collected field studies measuring Hg in megabenthos. The studies we used are shown in Table 6. We categorized the megabenthos into the same feeding categories, “deposit feeder”, “filter feeder”, “suspension feeder”, “grazer”, and “predator”. To better look at the effect of the trophic level, we also added “primary producers” as the base of the food web, and “seabird” and “benthic fish” as top predators. We analyzed whether trophic level and feeding strategy influence megaben-



thos iHg, MeHg, and/or tHg content. The observations were analyzed by visualizing the data, performing linear regression, and plotting a correlation matrix of the differences in bioaccumulation between different feeding strategies. The total and partial  $R^2$  of the linear regression of the trophic level and the feeding strategy were compared to analyze the effect of both drivers on bioaccumulated iHg, MeHg, and tHg.

#### Reviewer Comment

Figure 1. What is the black line that connects biota to detritus, DOM and sediment organic carbon?

#### Author Response

I will update the caption of the figure as stated in Fig. 5. I also added a dotted black line to show mortality from phytoplankton and zooplankton.

#### Reviewer Comment

Line 186. Rephrase “samples are sampled”

#### Suggested edit

Because of this, most samples are from shallow, well-mixed coastal areas, and we used this setup to evaluate the performance of the models.

#### Reviewer Comment

Section 3.1. How do the results of this analysis compare with published findings reported in the literature?

#### Author Response

In the literature there is relatively little attention to direct role of feeding strategy or phyla on bioaccumulation. Several individual papers remark things such as that mussels have higher values than crustaceans but I could not find our main conclusion supported in the literature. That being said, I hope the expansion of the paper by doing the further analyses with the data presented by McClelland et al. (2024) is convincing that while this interaction itself is not supported as a conclusion in literature studies, published data does support our conclusions.

#### Reviewer Comment

Line 255. Unclear meaning – “validate that they survive in the model”

#### Suggested edit

While our megabenthos groups only vary in their feeding strategies and lack a direct real-world counterpart, it is important to ensure that all functional groups have consistent biomass in the model and thus the results originate from the modeled interactions, and are not altered due to unrealistically high or low biomass in the model.



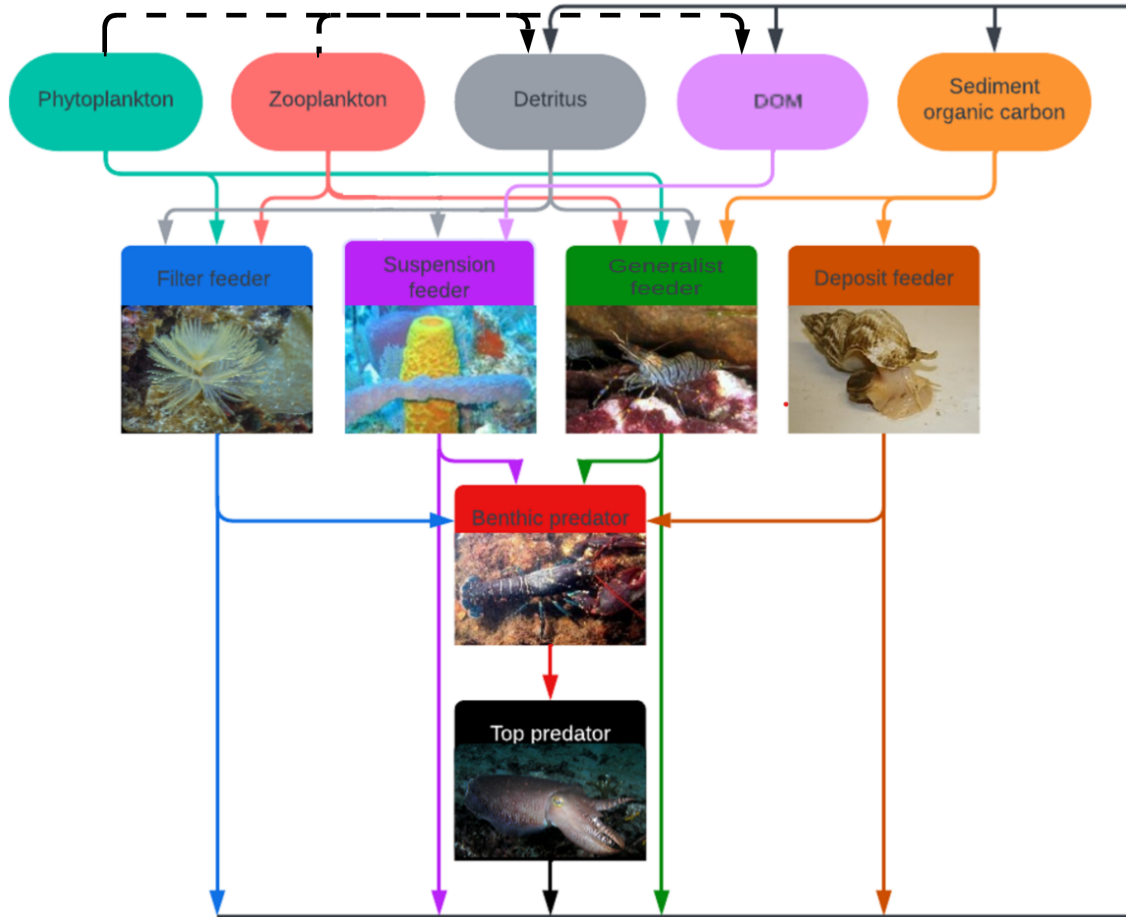

Figure 5: The overview of the modeled megabenthos functional groups and how they interact with each other and functional groups in the ECOSMO E2E model. There are 5 macrobenthic functional groups. The filter feeder feeds on pelagic detritus, zooplankton, and phytoplankton. The suspension feeders feed on pelagic detritus, phytoplankton, zooplankton, and DOM. The generalist feeds on phytoplankton, zooplankton, pelagic detritus, and sediment organic carbon. The deposit feeder feeds on sediment organic carbon. The benthic predator feeds on the other 4 megabenthos functional groups and the top predator solely feeds on the benthic predator. The arrows indicate trophic interactions where the arrow goes from the prey to the predator and the arrows have the same colour as the prey. The black lines represent loss of organic material due to mortality. When megabenthos die, their organic carbon is transferred to pelagic DOM and detritus, as well as the sediment, shown by the solid black arrow. In contrast, when pelagic organisms die, their organic carbon is transferred to DOM and detritus, indicated by the dotted black arrow.

#### Reviewer Comment

Figure 6. How do mercury concentrations per unit carbon (reported in Figure 6) compare to literature reported values that do not take carbon content into account?

#### Author Response

As described in above, the conversion factor of carbon to dry weight is assumed to be a 1:2 ratio for all functional groups. This conversion is indeed a source of uncertainty. I expanded on this in the suggested expansion of the paper at the beginning of the review, additionally as mentioned above I will add a brief explanation of the conversion factor on line 152. I hope that this expansion provides enough depth there.

#### Reviewer Comment

Line 310-313. Are there published empirical studies that support this model prediction regarding filter feeders?

#### Author Response

There is published empirical data, as described at the beginning of these answer, that supports our conclusion. But no studies directly comparing filter feeders in the way we did in this study with other feeding strategies. So our conclusion comes from the combination of having measurements that show elevated MeHg levels in filter feeders combined with a modeling explanation as why this might be because they are filter feeders.

#### Reviewer Comment

Line 361. Does the bioaccumulated inorganic mercury originate from water or dietary exposure?

#### Author Response

The majority of this in all categories except suspension feeders is via bioconcentration, thus uptake from the water. I would expand the sentence at line 361 to clarify this better.

#### Suggested edit

In Fig. 6 we can see that the vast majority of iHg in filter, deposit, and generalist feeders originates from bioconcentration, thus direct uptake from the water is the dominant pathway of iHg bioaccumulation in our model in these feeding strategies.

#### Reviewer Comment

Line 394. Explain further what is meant by “in vivo mercury speciation”.

#### Author Response

I will expand by the explanation in line 194 as follows:

### Suggested edit

A final interaction that we did not take into account is *in vivo Hg speciation*. With *in vivo Hg speciation* we refer to the transfer of Hg from one form to another inside organisms. Examples of this are the earlier mentioned demethylation in sponges by Orani et al. (2020) and additional studies demonstrating Hg speciation in cuttlefish by Gente et al. (2023) and Hg-methylating bacteria in copepods by Gorokhova et al. (2020). This indicates that the bioaccumulation of inorganic Hg and methylmercury may not be fully independent processes. These reactions are currently, however, poorly understood, and more laboratory and field studies are necessary to improve our understanding of these transformations before their significance can be assessed and it can be determined whether their inclusion in bioaccumulation models is needed.

### Reviewer Comment

Line 411. Where are these regression results presented earlier in the manuscript?

### Author Response

They are from Table 3 where the model is evaluated, but I can better describe the table outcome in text. I would add the following part to the end of section 3.3. where I discuss the results of the allometric scaling model.

### Suggested edit

Our base model does agree well with both observed iHg ( $R^2=0.84$ ) and MeHg ( $R^2=0.86$ ) in the Southern North Sea setup, but this is mostly driven by accurate predictions in the lower trophic levels while there is a normalized bias of -0.84 in the Top Predators. This is improved dramatically in the allometric scaling model with the reduction of the normalized bias of top predators to -0.32 which improves the overall  $R^2$  of the model to  $>0.99$ .

### Reviewer Comment

Line 436-437. This comment about bivalve communities is speculative.

### Reviewer Comment

Line 441-442. Consider concluding the paper with a recommendation for future work on model development.

### Author Response

I will answer these comments together by suggesting a rewrite of the closings remarks. I agree that it is speculative but I do think, especially considering the addition of the further analyses that also points als mollusc as being higher in MeHg that it is logical next step to take into account based on the results of this study. Would refrasing as below, and the expansion of the litearture study that point in the same direction be an acceptable form to rephrase it?

### Suggested edit

Filter feeders and molluscs typically accumulate more MeHg than other organisms at similar trophic levels. This pattern is consistent not only in our models but also in available data. This raises a hypothesis that expanding bivalve populations, as seen in mussel or oyster farming, might affect MeHg bioaccumulation in higher trophic levels. This is supported by the observations that fish in lakes invaded by zebra mussels have higher Hg levels than fish in lakes without zebra mussels Blinick et al. (2024). However, such ecological alterations also impact other bioaccumulation factors like biomass distribution and trophic interactions. While our findings support the role of filter feeders and molluscs in MeHg dynamics and higher bioaccumulation in top predators, the complexity of ecological situations requires further specific studies to understand if and when bivalve communities lead to increased MeHg transfer.

Modeling studies can help our understanding of the factors influencing MeHg bioaccumulation, but their predictive capabilities need to be carefully validated. Our findings reveal that filter-feeding mollusks and DOM-utilizing sponges exhibit distinct Hg bioaccumulation patterns compared to other megabenthos. Modeling bivalve aquaculture or DOM-consuming Porifera can help explore their potential role in altering MeHg bioaccumulation. Understanding how functional traits like feeding strategy influence MeHg transfer remains key to improving both predictive models and environmental risk assessments.

### Author Response

I would also add this section at the end of the model evaluation segment

### Suggested edit

Evaluation of the GOTM-MERCY-ECOSMO setup reveals performance strengths and weaknesses of the model. There is a strong correlation between the modeled and observed effect of the feeding strategy on the bioaccumulation of MeHg in both the Northern and Southern North Sea setups. However, the Southern North Sea setup outperforms the Northern setup in both pelagic Hg cycling and megabenthos bioaccumulation assessments. In the Northern North Sea setup, the mesozooplankton tHg levels are higher than expected, although this could not be properly validated due to a lack of measurements. What is more notable is our model results show a reduction in MeHg bioaccumulation in the Northern North Sea compared to the Southern North Sea, while this is not present in the observations presented by McClelland et al. (2024). Since the Northern North Sea does have a good agreement with observations in the correlation between the feeding strategy and the bioaccumulation of MeHg, but the overall model performance is lower due to lower than expected MeHg concentrations in all benthic groups, it is likely that the model underestimates the flux of MeHg from the pelagic to the benthic system. In the Southern North Sea setup, macrobenthos can feed directly on the phytoplankton bloom which results in a major exchange of organic material and MeHg between the benthic and pelagic food webs. In the Northern North Sea this is not possible, and the consumption of detritus, either by filtering it from the water or feeding on it from the sediment, is the main food source for megabenthos. The higher performance of the model in the Southern North Sea compared to the Northern North Sea indicates that this model could be further improved by enhancing the MeHg dynamics in deeper water.

## 4 Appendix

Table 6: Data used for the literature study. TL = trophic level, FS = feeding strategy. Values for tHg and MeHg are in ng Hg mg<sup>-1</sup> d.w.. Samples that were marked as large and small are marked with (l) and (s) in the table respectively.

| Species                           | TL  | FS           | tHg  | MeHg | Location                     | Phylum        | Reference                 |
|-----------------------------------|-----|--------------|------|------|------------------------------|---------------|---------------------------|
| Strongylocentrotus droebachiensis | 187 | Deposit      | 24   | 2    | Svalbard                     | Echinodermata | Korejwo et al., 2022      |
| Ophiopholis aculeata              | 270 | Filter       | 47   | 2    | Svalbard                     | Echinodermata | Korejwo et al., 2022      |
| Buccinum glaciale                 | 371 | Deposit      | 49   | 12   | Svalbard                     | Mollusca      | Korejwo et al., 2022      |
| Henricia sp                       | 317 | Predator     | 348  | 19   | Svalbard                     | Echinodermata | Korejwo et al., 2022      |
| Astarte borealis                  | 290 | Filter       | 44   | 10   | Chukchi Sea                  | Mollusca      | Fox et al., 2013          |
| Ampelisca macrocephala            | 270 | Deposit      | 70   | 32   | Chukchi Sea                  | Arthropoda    | Fox et al., 2013          |
| Chionoecetes opilio               | 410 | Predator     | 131  | 102  | Chukchi Sea                  | Mollusca      | Fox et al., 2013          |
| Neptunea heros                    | 430 | Predator     | 195  | 171  | Chukchi Sea                  | Mollusca      | Fox et al., 2013          |
| Buccinum spp                      | 410 | Predator     | 269  | 171  | Chukchi Sea                  | Arthropoda    | Fox et al., 2013          |
| Gammarellus sp.                   | 237 | Predator     | 39   | 15   | Gulf of St. Lawrence         | Mollusca      | Lavoie et al., 2010       |
| Littorina littorea                | 229 | Grazer       | 51   | 13   | Gulf of St. Lawrence         | Mollusca      | Lavoie et al., 2010       |
| Buccinum undatum                  | 283 | Predator     | 127  | 85   | Gulf of St. Lawrence         | Mollusca      | Lavoie et al., 2010       |
| Tectura testudinalis              | 200 | Grazer       | 51   | 9    | Gulf of St. Lawrence         | Mollusca      | Lavoie et al., 2010       |
| Strongylocentrotus droebachiensis | 169 | Deposit      | 42   | 5    | Gulf of St. Lawrence         | Echinodermata | Lavoie et al., 2010       |
| Hippoglossoides platessoides      | 422 | Benthic fish | 146  | 77   | Gulf of St. Lawrence         | Chordata      | Lavoie et al., 2010       |
| Glyptocephalus cynoglossus        | 422 | Benthic fish | 179  | 100  | Gulf of St. Lawrence         | Chordata      | Lavoie et al., 2010       |
| Somateria mollissima              | 347 | Seabird      | 640  | 565  | Gulf of St. Lawrence         | Chordata      | Lavoie et al., 2010       |
| Anguilla anguilla                 |     | Benthic fish | 1161 | 895  | Baltic Sea                   | Chordata      | Polak-Juszczak, 2018      |
| Gadus morhua                      |     | Benthic fish | 346  | 269  | Baltic Sea                   | Chordata      | Polak-Juszczak, 2018      |
| Platichthys flesus                |     | Benthic fish | 77   |      | Baltic Sea                   | Chordata      | Polak-Juszczak, 2014      |
| Platichthys flesus                |     | Benthic fish | 58   |      | Baltic Sea                   | Chordata      | Polak-Juszczak, 2014      |
| Pleuronectes platessa             |     | Benthic fish | 51   |      | Baltic Sea                   | Chordata      | Polak-Juszczak, 2014      |
| Pleuronectes platessa             |     | Benthic fish | 40   |      | Baltic Sea                   | Chordata      | Polak-Juszczak, 2014      |
| Scophthalmus maximus              |     | Benthic fish | 114  |      | Baltic Sea                   | Chordata      | Polak-Juszczak, 2014      |
| Scophthalmus maximus              |     | Benthic fish | 85   |      | Baltic Sea                   | Chordata      | Polak-Juszczak, 2014      |
| Macoma balthica                   |     | Deposit      | 53   |      | Baltic Sea                   | Mollusca      | Polak-Juszczak, 2014      |
| Macoma balthica                   |     | Deposit      | 25   |      | Baltic Sea                   | Mollusca      | Polak-Juszczak, 2014      |
| Saduria entomon                   |     | Predator     | 21   |      | Baltic Sea                   | Arthropoda    | Polak-Juszczak, 2014      |
| Saduria entomon                   |     | Predator     | 14   |      | Baltic Sea                   | Arthropoda    | Polak-Juszczak, 2014      |
| Acanthella acuta                  |     | Suspension   | 115  | 6    | Mediterranean Sea            | Porifera      | Orani et al., 2020        |
| Acanthella acuta                  |     | Suspension   | 66   | 7    | Mediterranean Sea            | Porifera      | Orani et al., 2020        |
| Acanthella acuta                  |     | Suspension   | 107  | 11   | Mediterranean Sea            | Porifera      | Orani et al., 2020        |
| Acanthella acuta                  |     | Suspension   | 95   | 9    | Mediterranean Sea            | Porifera      | Orani et al., 2020        |
| Axinella damicornis               |     | Suspension   | 148  | 4    | Mediterranean Sea            | Porifera      | Orani et al., 2020        |
| Axinella damicornis               |     | Suspension   | 97   | 2    | Mediterranean Sea            | Porifera      | Orani et al., 2020        |
| Axinella damicornis               |     | Suspension   | 212  | 9    | Mediterranean Sea            | Porifera      | Orani et al., 2020        |
| Axinella damicornis               |     | Suspension   | 252  | 7    | Mediterranean Sea            | Porifera      | Orani et al., 2020        |
| Chondrilla nucula                 |     | Suspension   | 149  | 2    | Mediterranean Sea            | Porifera      | Orani et al., 2020        |
| Chondrilla nucula                 |     | Suspension   | 233  | 1    | Mediterranean Sea            | Porifera      | Orani et al., 2020        |
| Chondrilla nucula                 |     | Suspension   | 519  | 4    | Mediterranean Sea            | Porifera      | Orani et al., 2020        |
| Chondrilla nucula                 |     | Suspension   | 317  | 4    | Mediterranean Sea            | Porifera      | Orani et al., 2020        |
| Haliclona fulva                   |     | Suspension   | 80   | 3    | Mediterranean Sea            | Porifera      | Orani et al., 2020        |
| Haliclona fulva                   |     | Suspension   | 76   | 2    | Mediterranean Sea            | Porifera      | Orani et al., 2020        |
| Haliclona fulva                   |     | Suspension   | 107  | 6    | Mediterranean Sea            | Porifera      | Orani et al., 2020        |
| Haliclona fulva                   |     | Suspension   | 146  | 6    | Mediterranean Sea            | Porifera      | Orani et al., 2020        |
| Halichondria panicea              |     | Suspension   | 81   | 23   | Killkieran Bay               | Porifera      | Orani et al., 2020        |
| Halichondria panicea              |     | Suspension   | 122  | 9    | Killkieran Bay               | Porifera      | Orani et al., 2020        |
| Hymeniacidon perlevis             |     | Suspension   | 107  | 20   | Killkieran Bay               | Porifera      | Orani et al., 2020        |
| Hymeniacidon perlevis             |     | Suspension   | 170  | 26   | Killkieran Bay               | Porifera      | Orani et al., 2020        |
| Chlamys nobilis                   |     | Filter       | 60   | 19   | Dapeng Bay                   | Mollusca      | Pan and Wang, 2011        |
| Ruditapes philippinarum           |     | Filter       | 47   | 17   | Tolo Harbo                   | Mollusca      | Pan and Wang, 2011        |
| Saccostrea cucullata              |     | Filter       | 70   | 15   | Clear Water Bay              | Mollusca      | Pan and Wang, 2011        |
| Perna viridis                     |     | Filter       | 30   | 9    | Tolo Harbo                   | Mollusca      | Pan and Wang, 2011        |
| Septifer virgatus                 |     | Filter       | 92   | 10   | Clear Water Bay              | Mollusca      | Pan and Wang, 2011        |
| Mytilidae spp                     |     | Filter       | 142  | 79   | Eastern U.S.                 | Mollusca      | Chen et al., 2014         |
| Mytilidae spp                     |     | Filter       |      | 83   | Eastern U.S.                 | Mollusca      | V. F. Taylor et al., 2019 |
| Mytilidae spp                     |     | Filter       | 95   |      | Narragansett Bay, RI/MA U.S. | Mollusca      | D. L. Taylor et al., 2012 |
| Mytilidae spp                     |     | Filter       | 173  |      | Gulf of St. Lawrence         | Mollusca      | Cossa and Tabard, 2020    |
| Maldanidae spp.                   |     | Deposit      | 101  | 70   | Minas Basin, Bay of Fundy    | Annelida      | Sizmur et al., 2013       |
| Maldanidae spp.                   |     | Deposit      | 20   |      | Bay of Fundy, Nova Scotia    | Annelida      | English et al., 2015      |
| Glyceridae spp.                   |     | Predator     | 37   | 9    | Minas Basin, Bay of Fundy    | Annelida      | Sizmur et al., 2013       |
| Nereidae spp.                     |     | Deposit      | 139  |      | Narragansett Bay, RI/MA U.S. | Annelida      | V. F. Taylor et al., 2019 |
| Nereidae spp.                     |     | Deposit      | 10   |      | Bay of Fundy, Nova Scotia    | Annelida      | English et al., 2015      |
| Ilyanassa obsoleta                |     | Deposit      | 177  |      | Narragansett Bay, RI/MA U.S. | Mollusca      | V. F. Taylor et al., 2019 |
| Ilyanassa obsoleta                |     | Deposit      | 60   |      | Gulf of Maine                | Mollusca      | Chen et al., 2009         |
| Ilyanassa obsoleta                |     | Deposit      | 40   |      | Bay of Fundy, Nova Scotia    | Mollusca      | English et al., 2015      |
| Littorina littorea                |     | Grazer       | 90   |      | Narragansett Bay, RI/MA U.S. | Mollusca      | V. F. Taylor et al., 2019 |
| Littorina littorea                |     | Grazer       |      | 30   | Eastern U.S.                 | Mollusca      | V. F. Taylor et al., 2019 |
| Littorina littorea                |     | Grazer       | 20   |      | Bay of Fundy, Nova Scotia    | Mollusca      | English et al., 2015      |
| Corophium volutator               |     | Deposit      | 43   | 11   | Minas Basin, Bay of Fundy    | Mollusca      | Sizmur et al., 2013       |
| Corophium volutator               |     | Deposit      | 10   |      | Bay of Fundy, Nova Scotia    | Mollusca      | English et al., 2015      |
| Amphipod spp.                     |     | Deposit      | 93   |      | Narragansett Bay, RI/MA U.S. | Arthropoda    | V. F. Taylor et al., 2019 |
| Amphipod spp.                     |     | Deposit      | 12   |      | Gulf of Maine                | Arthropoda    | Chen et al., 2009         |
| Carcinus maenas                   |     | Predator     | 57   | 42   | Eastern U.S.                 | Arthropoda    | Chen et al., 2014         |
| Carcinus maenas                   |     | Predator     | 126  |      | Narragansett Bay, RI/MA U.S. | Arthropoda    | V. F. Taylor et al., 2019 |
| Carcinus maenas                   |     | Predator     |      | 80   | Eastern U.S.                 | Arthropoda    | V. F. Taylor et al., 2019 |
| Macoma balthica                   |     | Deposit      | 10   |      | Bay of Fundy, Nova Scotia    | Mollusca      | English et al., 2015      |
| Balanus balan                     | 232 | Filter       | 10   | 3    | Minas Basin, Bay of Fundy    | Arthropoda    | Bradford et al., 2023     |
| Carcinus maenas                   | 291 | Predator     | 32   | 23   | Minas Basin, Bay of Fundy    | Arthropoda    | Bradford et al., 2023     |
| Corophium volutator               | 200 | Deposit      | 22   | 11   | Minas Basin, Bay of Fundy    | Arthropoda    | Bradford et al., 2023     |
| Glyceridae spp.                   | 415 | Predator     | 29   | 18   | Minas Basin, Bay of Fundy    | Annelida      | Bradford et al., 2023     |
| Goniadidae spp.                   | 418 | Predator     | 69   | 37   | Minas Basin, Bay of Fundy    | Annelida      | Bradford et al., 2023     |
| Ilyanassa obsoleta                | 259 | Deposit      | 139  | 26   | Minas Basin, Bay of Fundy    | Mollusca      | Bradford et al., 2023     |
| Lineidae spp.                     | 299 | Deposit      | 31   | 13   | Minas Basin, Bay of Fundy    | Annelida      | Bradford et al., 2023     |
| Littorina littorea                | 234 | Grazer       | 60   | 8    | Minas Basin, Bay of Fundy    | Mollusca      | Bradford et al., 2023     |
| Macoma balthica                   | 232 | Deposit      | 76   | 11   | Minas Basin, Bay of Fundy    | Mollusca      | Bradford et al., 2023     |
| Maldanidae spp.                   | 237 | Deposit      | 45   | 23   | Minas Basin, Bay of Fundy    | Annelida      | Bradford et al., 2023     |
| Mytilus edulis                    | 210 | Filter       | 59   | 10   | Minas Basin, Bay of Fundy    | Mollusca      | Bradford et al., 2023     |
| Nereidae spp.                     | 221 | Deposit      | 80   | 6    | Minas Basin, Bay of Fundy    | Annelida      | Bradford et al., 2023     |
| Pagurus acadiarnus                | 290 | Predator     | 17   | 7    | Minas Basin, Bay of Fundy    | Arthropoda    | Bradford et al., 2023     |

| Species                                  | TL  | FS            | THg    | MeHg  | Location                  | Phylum        | Reference               |
|------------------------------------------|-----|---------------|--------|-------|---------------------------|---------------|-------------------------|
| Phyllodocidae spp.                       | 294 | Predator      | 67     | 18    | Minas Basin, Bay of Fundy | Annelida      | Bradford et al., 2023   |
| <i>Balanus balanus</i>                   |     | Filter        | 7.92   | 1.87  | Minas Basin, Bay of Fundy | Arthropoda    | Bradford et al., 2024   |
| <i>Corophium volutator</i>               |     | Deposit       | 25.28  | 12.68 | Minas Basin, Bay of Fundy | Arthropoda    | Bradford et al., 2024   |
| <i>Ilyanassa obsoleta</i>                |     | Deposit       | 112.43 | 36.2  | Minas Basin, Bay of Fundy | Mollusca      | Bradford et al., 2024   |
| <i>Littorina littorea</i>                |     | Grazer        | 56.58  | 10.82 | Minas Basin, Bay of Fundy | Mollusca      | Bradford et al., 2024   |
| Nereidae spp.                            |     | Deposit       | 15.16  | 4.29  | Minas Basin, Bay of Fundy | Annelida      | Bradford et al., 2024   |
| <i>Balanus balanus</i>                   |     | Filter        | 15.87  | 2.47  | Minas Basin, Bay of Fundy | Arthropoda    | Bradford et al., 2024   |
| <i>Ilyanassa obsoleta</i>                |     | Deposit       | 195.39 | 8.76  | Minas Basin, Bay of Fundy | Mollusca      | Bradford et al., 2024   |
| <i>Littorina littorea</i>                |     | Grazer        | 57.58  | 5.74  | Minas Basin, Bay of Fundy | Mollusca      | Bradford et al., 2024   |
| <i>Mytilus edulis</i>                    |     | Filter        | 62.07  | 13.97 | Minas Basin, Bay of Fundy | Mollusca      | Bradford et al., 2024   |
| <i>Pagurus acadianus</i>                 |     | Predator      | 14.68  | 4.23  | Minas Basin, Bay of Fundy | Arthropoda    | Bradford et al., 2024   |
| <i>Corophium volutator</i>               |     | Deposit       | 23.95  | 8.68  | Minas Basin, Bay of Fundy | Arthropoda    | Bradford et al., 2024   |
| <i>Ilyanassa obsoleta</i>                |     | Deposit       | 161.23 | 45    | Minas Basin, Bay of Fundy | Mollusca      | Bradford et al., 2024   |
| <i>Littorina littorea</i>                |     | Grazer        | 81.97  | 3.23  | Minas Basin, Bay of Fundy | Mollusca      | Bradford et al., 2024   |
| Nereidae spp.                            |     | Deposit       | 62.8   | 9.61  | Minas Basin, Bay of Fundy | Annelida      | Bradford et al., 2024   |
| <i>Pagurus acadianus</i>                 |     | Predator      | 18.37  | 8.59  | Minas Basin, Bay of Fundy | Arthropoda    | Bradford et al., 2024   |
| <i>Balanus balanus</i>                   |     | Filter        | 6.73   | 3.86  | Minas Basin, Bay of Fundy | Arthropoda    | Bradford et al., 2024   |
| <i>Corophium volutator</i>               |     | Deposit       | 19.59  | 9.94  | Minas Basin, Bay of Fundy | Arthropoda    | Bradford et al., 2024   |
| <i>Ilyanassa obsoleta</i>                |     | Deposit       | 116.3  | 17.6  | Minas Basin, Bay of Fundy | Mollusca      | Bradford et al., 2024   |
| <i>Littorina littorea</i>                |     | Grazer        | 50.88  | 9.53  | Minas Basin, Bay of Fundy | Mollusca      | Bradford et al., 2024   |
| <i>Mytilus edulis</i>                    |     | Filter        | 56.3   | 7.33  | Minas Basin, Bay of Fundy | Mollusca      | Bradford et al., 2024   |
| <i>Pagurus acadianus</i>                 |     | Predator      | 14.3   | 4.75  | Minas Basin, Bay of Fundy | Arthropoda    | Bradford et al., 2024   |
| <i>Corophium volutator</i>               |     | Deposit       | 21.24  | 12    | Minas Basin, Bay of Fundy | Arthropoda    | Bradford et al., 2024   |
| Nereidae spp.                            |     | Deposit       | 95.66  | 4.75  | Minas Basin, Bay of Fundy | Annelida      | Bradford et al., 2024   |
| <i>Acanthostepheia behringiensis</i> (l) | 350 | Deposit       |        | 80    | Cape Bathurst (CB)        | Arthropoda    | McClelland et al., 2024 |
| <i>Acanthostepheia behringiensis</i> (l) | 310 | Deposit       |        | 62    | Mackenzie Trough (MT)     | Arthropoda    | McClelland et al., 2024 |
| <i>Acanthostepheia behringiensis</i> (s) | 220 | Deposit       |        | 9     | Cape Bathurst (CB)        | Arthropoda    | McClelland et al., 2024 |
| <i>Ampelisca</i> spp.                    | 210 | Deposit       |        | 4     | Cape Bathurst (CB)        | Arthropoda    | McClelland et al., 2024 |
| <i>Anonyx nugax</i>                      | 370 | Deposit       |        | 231   | Mackenzie Trough (MT)     | Arthropoda    | McClelland et al., 2024 |
| <i>Arctolembos arcticus</i>              | 220 | Deposit       |        | 7     | Cape Bathurst (CB)        | Arthropoda    | McClelland et al., 2024 |
| <i>Paramphithoe</i> sp.                  | 330 | Deposit       |        | 127   | Mackenzie Trough (MT)     | Arthropoda    | McClelland et al., 2024 |
| <i>Pleustes panoplus</i>                 | 270 | Deposit       |        | 21    | Cape Bathurst (CB)        | Arthropoda    | McClelland et al., 2024 |
| <i>Rhachotropis aculeata</i>             | 310 | Deposit       |        | 55    | Cape Bathurst (CB)        | Arthropoda    | McClelland et al., 2024 |
| Unidentified amphipod sp.                | 340 | Deposit       |        | 79    | Mackenzie Trough (MT)     | Arthropoda    | McClelland et al., 2024 |
| <i>Diastylidae</i> sp.                   | 200 | Deposit       |        | 8     | Cape Bathurst (CB)        | Arthropoda    | McClelland et al., 2024 |
| <i>Diastylidae</i> sp.                   | 190 | Deposit       |        | 12    | Mackenzie Trough (MT)     | Arthropoda    | McClelland et al., 2024 |
| <i>Munnopsis typica</i>                  | 270 | Deposit       |        | 29    | Cape Bathurst (CB)        | Arthropoda    | McClelland et al., 2024 |
| <i>Saduria entomon</i>                   | 310 | Deposit       |        | 53    | Mackenzie Trough (MT)     | Arthropoda    | McClelland et al., 2024 |
| <i>Saduria sabini</i>                    | 350 | Deposit       |        | 39    | Cape Bathurst (CB)        | Arthropoda    | McClelland et al., 2024 |
| <i>Saduria sabini</i>                    | 280 | Deposit       |        | 47    | Mackenzie Trough (MT)     | Arthropoda    | McClelland et al., 2024 |
| <i>Synidotea bicuspidata</i>             | 310 | Deposit       |        | 19    | Cape Bathurst (CB)        | Arthropoda    | McClelland et al., 2024 |
| <i>Synidotea bicuspidata</i>             | 290 | Deposit       |        | 28    | Mackenzie Trough (MT)     | Arthropoda    | McClelland et al., 2024 |
| <i>Eualus gaimardii</i>                  | 350 | Generalist    |        | 52    | Cape Bathurst (CB)        | Arthropoda    | McClelland et al., 2024 |
| <i>Eualus gaimardii</i>                  | 340 | Generalist    |        | 106   | Mackenzie Trough (MT)     | Arthropoda    | McClelland et al., 2024 |
| <i>Sabinea septemcarinata</i>            | 330 | Generalist    |        | 35    | Cape Bathurst (CB)        | Arthropoda    | McClelland et al., 2024 |
| <i>Sabinea septemcarinata</i>            | 350 | Generalist    |        | 93    | Mackenzie Trough (MT)     | Arthropoda    | McClelland et al., 2024 |
| <i>Spirontocaris</i> sp.                 | 300 | Generalist    |        | 134   | Mackenzie Trough (MT)     | Arthropoda    | McClelland et al., 2024 |
| <i>Nymphonidae</i> sp.                   | 340 | Predator      |        | 32    | Cape Bathurst (CB)        | Arthropoda    | McClelland et al., 2024 |
| <i>Nymphonidae</i> sp.                   | 390 | Predator      |        | 299   | Mackenzie Trough (MT)     | Arthropoda    | McClelland et al., 2024 |
|                                          | 330 | Filter feeder |        | 29    | Cape Bathurst (CB)        | Cnidaria      | McClelland et al., 2024 |
|                                          | 330 | Filter feeder |        | 38    | Mackenzie Trough (MT)     | Cnidaria      | McClelland et al., 2024 |
| <i>Gersemia rubiformis</i>               | 260 | Filter feeder |        | 17    | Mackenzie Trough (MT)     | Cnidaria      | McClelland et al., 2024 |
| <i>Crossaster papposus</i>               | 350 | Predator      |        | 367   | Mackenzie Trough (MT)     | Echinodermata | McClelland et al., 2024 |
| <i>Leptasterias littoralis</i>           | 270 | Predator      |        | 66    | Cape Bathurst (CB)        | Echinodermata | McClelland et al., 2024 |
| <i>Leptasterias</i> spp.                 | 290 | Filter feeder |        | 244   | Mackenzie Trough (MT)     | Echinodermata | McClelland et al., 2024 |
| <i>Ophiocten sericeum</i>                | 240 | Deposit       |        | 8     | Cape Bathurst (CB)        | Echinodermata | McClelland et al., 2024 |
| <i>Ophiocten sericeum</i>                | 260 | Deposit       |        | 14    | Mackenzie Trough (MT)     | Echinodermata | McClelland et al., 2024 |
| <i>Ophiacantha bidentata</i>             | 340 | Deposit       |        | 42    | Mackenzie Trough (MT)     | Echinodermata | McClelland et al., 2024 |
| <i>Stegophiura nodosa</i>                | 280 | Deposit       |        | 13    | Cape Bathurst (CB)        | Echinodermata | McClelland et al., 2024 |
| <i>Psolus</i> sp.                        | 220 | Filter        |        | 17    | Mackenzie Trough (MT)     | Echinodermata | McClelland et al., 2024 |
| <i>Amphiporus</i> sp.                    | 280 | Deposit       |        | 34    | Cape Bathurst (CB)        | Nemertea      | McClelland et al., 2024 |
| Unidentified sipunculid sp. A            | 110 | Deposit       |        | 1.5   | Cape Bathurst (CB)        | Annelida      | McClelland et al., 2024 |
| Unidentified sipunculid sp. A            | 130 | Deposit       |        | 1.5   | Mackenzie Trough (MT)     | Annelida      | McClelland et al., 2024 |
| <i>Bylgides</i> sp.                      | 340 | Predator      |        | 24    | Cape Bathurst (CB)        | Annelida      | McClelland et al., 2024 |
| <i>Bylgides sarsi</i>                    | 300 | Predator      |        | 54    | Mackenzie Trough (MT)     | Annelida      | McClelland et al., 2024 |
| <i>Gattyana cirrhosa</i>                 | 320 | Predator      |        | 69    | Cape Bathurst (CB)        | Annelida      | McClelland et al., 2024 |
| <i>Harmothoe imbricata</i>               | 310 | Predator      |        | 40    | Cape Bathurst (CB)        | Annelida      | McClelland et al., 2024 |
| <i>Nephtys</i> sp.                       | 290 | Predator      |        | 149   | Mackenzie Trough (MT)     | Annelida      | McClelland et al., 2024 |
| <i>Nereis zonata</i>                     | 230 | Deposit       |        | 20    | Mackenzie Trough (MT)     | Annelida      | McClelland et al., 2024 |
| <i>Pectinaria hyperborea</i>             | 190 | Deposit       |        | 48    | Cape Bathurst (CB)        | Annelida      | McClelland et al., 2024 |
| <i>Phyllodoce groenlandica</i>           | 210 | Predator      |        | 41    | Cape Bathurst (CB)        | Annelida      | McClelland et al., 2024 |
| Unidentified polychaete sp.*             | 220 | Predator      |        | 22    | Mackenzie Trough (MT)     | Annelida      | McClelland et al., 2024 |
| <i>Astarte borealis</i>                  | 250 | Filter        |        | 32    | Cape Bathurst (CB)        | Mollusca      | McClelland et al., 2024 |
| <i>Astarte</i> spp                       | 270 | Filter        |        | 36    | Cape Bathurst (CB)        | Mollusca      | McClelland et al., 2024 |
| <i>Astarte</i> spp                       | 250 | Filter        |        | 59    | Mackenzie Trough (MT)     | Mollusca      | McClelland et al., 2024 |
| <i>Clinocardium ciliatum</i>             | 250 | Filter        |        | 71    | Cape Bathurst (CB)        | Mollusca      | McClelland et al., 2024 |
| <i>Clinocardium ciliatum</i>             | 260 | Filter        |        | 173   | Mackenzie Trough (MT)     | Mollusca      | McClelland et al., 2024 |
| <i>Cyclocardia</i> sp.                   | 180 | Filter        |        | 89    | Mackenzie Trough (MT)     | Mollusca      | McClelland et al., 2024 |
| <i>Nuculana pernula</i>                  | 240 | Deposit       |        | 47    | Mackenzie Trough (MT)     | Mollusca      | McClelland et al., 2024 |
| <i>Similipecten greenlandicus</i>        | 290 | Deposit       |        | 76    | Cape Bathurst (CB)        | Mollusca      | McClelland et al., 2024 |
| <i>Similipecten greenlandicus</i>        | 290 | Deposit       |        | 146   | Mackenzie Trough (MT)     | Mollusca      | McClelland et al., 2024 |
| <i>Yoldia hyperborea</i>                 | 220 | Deposit       |        | 15    | Cape Bathurst (CB)        | Mollusca      | McClelland et al., 2024 |
| <i>Boreotrophon truncatus</i>            | 260 | Predator      |        | 10    | Mackenzie Trough (MT)     | Mollusca      | McClelland et al., 2024 |
| <i>Buccinum polare</i>                   | 300 | Predator      |        | 172   | Mackenzie Trough (MT)     | Mollusca      | McClelland et al., 2024 |
| <i>Buccinum</i> spp.                     | 260 | Predator      |        | 89    | Mackenzie Trough (MT)     | Mollusca      | McClelland et al., 2024 |
| <i>Cryptonatica</i> sp.                  | 280 | Predator      |        | 141   | Mackenzie Trough (MT)     | Mollusca      | McClelland et al., 2024 |
| <i>Cylichna</i> sp.                      | 220 | Predator      |        | 26    | Mackenzie Trough (MT)     | Mollusca      | McClelland et al., 2024 |
| <i>Margarites costalis</i>               | 290 | Deposit       |        | 61    | Mackenzie Trough (MT)     | Mollusca      | McClelland et al., 2024 |
| <i>Neptunea</i> sp.                      | 280 | Predator      |        | 268   | Mackenzie Trough (MT)     | Mollusca      | McClelland et al., 2024 |
| <i>Tachyrhynchus</i> spp.                | 140 | Predator      |        | 14    | Mackenzie Trough (MT)     | Mollusca      | McClelland et al., 2024 |

## References

- Allison, J. D., Allison, T. L., & Ambrose, R. B. (2005). *ALLISON, J. D. AND T. L. ALLISON. PARTITION COEFFICIENTS FOR METALS IN SURFACE WATER, SOIL, AND WASTE. U.S. Environmental Protection Agency, Washington, DC* (tech. rep.).
- Amptmeijer, D. J., Bieser, J., Mikheeva, E., Daewel, U., & Schrum, C. (2025). Bioaccumulation as a driver of high MeHg in coastal Seas. *EGUsphere [preprint]*.
- Bieser, J., Amptmeijer, D., Daewel, U., Kuss, J., Soerenson, A. L., & Schrum, C. (2023). The 3D biogeochemical marine mercury cycling model MERCY v2.0; linking atmospheric Hg to methyl mercury in fish. *Geoscientific Model Development Discussions*, 1–59.
- Blinick, N. S., Link, D., Ahrenstorff, T. D., Bethke, B. J., Fleishman, A. B., Janssen, S. E., Krabbenhoft, D. P., Nelson, J. K. R., Rantala, H. M., Rude, C. L., & Hansen, G. J. A. (2024). Increased mercury concentrations in walleye and yellow perch in lakes invaded by zebra mussels.
- Bradford, M. A., Mallory, M. L., & O'Driscoll, N. J. (2023). Mercury bioaccumulation and speciation in coastal invertebrates: Implications for trophic magnification in a marine food web. *Marine Pollution Bulletin*, 188, 114647.
- Bradford, M. A., Mallory, M. L., & O'Driscoll, N. J. (2024). Ecology and environmental characteristics influence methylmercury bioaccumulation in coastal invertebrates. *Chemosphere*, 346, 140502.
- Buckman, K. L., Seelen, E. A., Mason, R. P., Balcom, P., Taylor, V. F., Ward, J. E., & Chen, C. Y. (2019). Sediment organic carbon and temperature effects on methylmercury concentration: a mesocosm experiment. *The Science of the total environment*, 666, 1316.
- Chen, C. Y., Borsuk, M. E., Bugge, D. M., Hollweg, T., Balcom, P. H., Ward, D. M., Williams, J., & Mason, R. P. (2014). Benthic and Pelagic Pathways of Methylmercury Bioaccumulation in Estuarine Food Webs of the Northeast United States. *PLOS ONE*, 9(2), e89305.
- Chen, C. Y., Dionne, M., Mayes, B. M., Ward, M., Darron, Sturup Stefan, & Brian, J. P. (2009). Mercury Bioavailability and Bioaccumulation in Estuarine Food Webs in the Gulf of Maine. *Environ. Sci. Technol.*, 43, 1804–1810.
- Coquery, M., & Cossa, D. (1995). Mercury speciation in surface waters of the north sea. *Netherlands Journal of Sea Research*, 34(4), 245–257.
- Cossa, D., & Tabard, A.-M. (2020). Mercury in Marine Mussels from the St. Lawrence Estuary and Gulf (Canada): A Mussel Watch Survey Revisited after 40 Years. *Applied science*, 10, 7556.
- Dutton, J., & Fisher, N. S. (2012). Bioavailability of sediment-bound and algal metalsto killifish *Fundulus heteroclitus*. *Aquatic biology*, 16, 85–96.
- Eklöf, J., Austin, Å., Bergström, U., Donadi, S., Eriksson, B. D., Hansen, J., & Sundblad, G. (2017). Size matters: Relationships between body size and body mass of common coastal, aquatic invertebrates in the Baltic Sea. *PeerJ*, 2017(1), e2906.
- English, M. D., Robertson, G. J., & Mallory, M. L. (2015). Trace element and stable isotope analysis of fourteen species of marine invertebrates from the Bay of Fundy, Canada. *Marine Pollution Bulletin*, 101(1), 466–472.
- Evers, D. C., Egan Keane, S., Basu, N., & Buck, D. (2016). Evaluating the effectiveness of the Minamata Convention on Mercury: Principles and recommendations for next steps.
- Fox, A. L., Hughes, E. A., Trocine, R. P., Trefry, J. H., Schonberg, S. V., McTigue, N. D., Lasorsa, B. K., Konar, B., & Cooper, L. W. (2013). Mercury in the northeastern Chukchi Sea: Distribution patterns in seawater and sediments and biomagnification in the benthic food web.
- Gente, S., Minet, A., Lopes, C., Tessier, E., Gassie, C., Guyoneaud, R., Swarzenski, P. W., Bustamante, P., Metian, M., Amouroux, D., & Lacoue-Labarthe, T. (2023). In Vivo

- Mercury (De)Methylation Metabolism in Cephalopods under Different pCO<sub>2</sub> Scenarios. *Cite This: Environ. Sci. Technol*, 57, 5770.
- Geyman, B. M., Streets, D. G., Olson, C. I., Thackray, C. P., Olson, C. L., Schaefer, K., Krabbenhoft, D. P., & Sunderland, E. M. (2025). Cumulative Anthropogenic Impacts of Past and Future Emissions and Releases on the Global Mercury Cycle. *Environmental Science and Technology*, 59(17), 8578–8590.
- Gorokhova, E., & Hansson, S. (2000). Elemental composition of *Mysis mixta* (Crustacea, Mysidacea) and energy costs of reproduction and embryogenesis under laboratory conditions. *Journal of Experimental Marine Biology and Ecology*, 246(1), 103–123.
- Gorokhova, E., Soerensen, A. L., & Motwani, N. H. (2020). Mercury-methylating bacteria are associated with copepods: A proof-of-principle survey in the Baltic Sea. *PLoS ONE*, 15(3).
- Jurkiewicz-Karnkowska, E. (2005). Some Aspects of Nitrogen, Carbon and Calcium Accumulation in Molluscs from the Zegrzyński Reservoir Ecosystem. *Polish Journal of Environmental Studies*, 14(2), 173–177.
- Korejwo, E., Saniewska, D., Beldowski, J., Balazy, P., & Saniewski, M. (2022). Mercury concentration and speciation in benthic organisms from Isfjorden, Svalbard. *Marine Pollution Bulletin*, 184, 114115.
- Lavoie, R. A., Hebert, C. E., Rail, J.-F., Braune, B. M., Yumvihoze, E., Hill, L. G., & Lean, D. R. S. (2010). Trophic structure and mercury distribution in a Gulf of St. Lawrence (Canada) food web using stable isotope analysis.
- McClelland, C., Chételat, J., Conlan, K., Aitken, A., Forbes, M. R., & Majewski, A. (2024). Methylmercury dietary pathways and bioaccumulation in Arctic benthic invertebrates of the Beaufort Sea. *Arctic Science*, 10(2), 305–320.
- Nfon, E., Cousins, I. T., Järvinen, O., Mukherjee, A. B., Verta, M., & Broman, D. (2009). Trophodynamics of mercury and other trace elements in a pelagic food chain from the Baltic Sea.
- Orani, A. M., Vassileva, E., Azemard, S., & Thomas, O. P. (2020). Comparative study on Hg bioaccumulation and biotransformation in Mediterranean and Atlantic sponge species. *Chemosphere*, 260, 127515.
- Pan, K., & Wang, W. X. (2011). Mercury accumulation in marine bivalves: Influences of biodynamics and feeding niche. *Environmental Pollution*, 159(10), 2500–2506.
- Pickhardt, P. C., Stepanova, M., & Fisher, N. S. (2006). Contrasting uptake routes and tissue distributions of inorganic and methylmercury in mosquitofish (*Gambusia affinis*) and redear sunfish (*Lepomis microlophus*). *Environmental Toxicology and Chemistry*, 25(8), 2132–2142.
- Polak-Juszczak, L. (2014). Selenium and mercury molar ratios in commercial fish from the Baltic Sea: Additional risk assessment criterion for mercury exposure.
- Polak-Juszczak, L. (2018). Distribution of organic and inorganic mercury in the tissues and organs of fish from the southern Baltic Sea. *Environmental Science and Pollution Research*, 25, 34181–34189.
- Silberberger, M. J., Renaud, P. E., Kröncke, I., & Reiss, H. (2018). Food-web structure in four locations along the European shelf indicates spatial differences in ecosystem functioning. *Frontiers in Marine Science*, 5(APR), 300569.
- Sizmur, T., Canário, J., Gerwing, T. G., Mallory, M. L., & O'Driscoll, N. J. (2013). Mercury and methylmercury bioaccumulation by polychaete worms is governed by both feeding ecology and mercury bioavailability in coastal mudflats. *Environmental Pollution*, 176, 18–25.
- Taylor, D. L., Linehan, J. C., Murray, D. W., & Prell, W. L. (2012). Indicators of sediment and biotic mercury contamination in a southern New England estuary. *Marine Pollution Bulletin*, 64(4), 807–819.



- Taylor, V. F., Buckman, K. L., Seelen, E. A., Mazrui, N. M., Balcom, P. H., Mason, R. P., & Chen, C. Y. (2019). Organic carbon content drives methylmercury levels in the water column and in estuarine food webs across latitudes in the Northeast United States. *Environmental Pollution*, 246, 639–649.
- Tesán Onrubia, J. A., Petrova, M. V., Puigcorbé, V., Black, E. E., Valk, O., Dufour, A., Hamelin, B., Buessler, K. O., Masqué, P., Le Moigne, F. A., Sonke, J. E., Rutgers Van Der Loeff, M., & Heimbürger-Boavida, L. E. (2020). Mercury Export Flux in the Arctic Ocean Estimated from  $^{234}\text{Th}/^{238}\text{U}$  Disequilibria. *ACS Earth and Space Chemistry*, 4(5), 795–801.
- Tsui, M. T., & Wang, W. X. (2004). Uptake and Elimination Routes of Inorganic Mercury and Methylmercury in *Daphnia magna*. *Environmental Science and Technology*, 38(3), 808–816.
- Wang, W. X., & Tan, Q. G. (2019). Applications of dynamic models in predicting the bioaccumulation, transport and toxicity of trace metals in aquatic organisms. *Environmental Pollution*, 252, 1561–1573.
- Wang, W., & Wong, R. (2003). Bioaccumulation kinetics and exposure pathways of inorganic mercury and methylmercury in a marine fish, the sweetlips *Plectorhinchus gibbosus*. *Marine Ecology Progress Series*, 261.
- Weil, J., Trudel, M., Tucker, S., Brodeur, R. D., & Juanes, F. (2019). Percent ash-free dry weight as a robust method to estimate energy density across taxa. *Ecology and Evolution*, 9(23), 13244–13254.
